1 Title: **Metabolomics and biochemical approaches link salicylic acid biosynthesis to**  
2 **cyanogenesis in peach plants**

3 Running title: **Salicylic acid biosynthesis link to cyanogenesis**

4  
5 Diaz-Vivancos Pedro<sup>1\*</sup>, Bernal-Vicente Agustina<sup>1</sup> ([abernal@abiopep.com](mailto:abernal@abiopep.com)), Cantabella  
6 Daniel<sup>1</sup> ([dcantabella@cebas.csic.es](mailto:dcantabella@cebas.csic.es)), Petri Cesar<sup>2</sup> ([cesar.petri@upct.es](mailto:cesar.petri@upct.es)), Hernández José  
7 Antonio<sup>1</sup> ([jahernan@cebas.csic.es](mailto:jahernan@cebas.csic.es))

8 <sup>1</sup> Biotechnology of Fruit Trees Group, Dept. Plant Breeding, CEBAS-CSIC, Campus  
9 Universitario de Espinardo, 25. 30100 Murcia (Spain)

10 <sup>2</sup> Departamento de Producción Vegetal, Universidad Politécnica de Cartagena, Paseo  
11 Alfonso XIII, 48, 30203 Cartagena (Spain)

12  
13 \*Corresponding author

14 Dr. Pedro Diaz-Vivancos ([pdv@cebas.csic.es](mailto:pdv@cebas.csic.es))

15 CEBAS-CSIC, Campus Universitario de Espinardo, 25. 30100 Murcia (Spain)

16 Phone number: +34 968 396200 ext. 6310 ; FAX: +34 968 396213

17  
18  
19  
20 Date of submission: June 8, 2017

21 Number of tables: 3

22 Number of figures: 8 (1 colour)

23 Word count: 4256

24 Supplementary data: 1 figure

30 **Highlight**

31 Mandelonitrile, and hence cyanogenic glycosides turnover, is involved in salicylic acid  
32 (SA) biosynthesis in peach plants under control and stress conditions. A third pathway for  
33 SA synthesis in peach is proposed.

34

35 **Abstract**

36 Despite the long-established importance of salicylic acid (SA) in plant stress responses  
37 and other biological processes, its biosynthetic pathway has not been fully characterized.  
38 The proposed SA synthesis originates from chorismate by two distinct pathways:  
39 isochorismate and penhylalanine (Phe) ammonia-lyase (PAL) pathways. Cyanogenesis is  
40 the process related to the release of hydrogen cyanide from endogenous cyanogenic  
41 glycosides (CNglcs), and it has been linked to plant plasticity improvement. To date,  
42 however, no relationship has been suggested between both pathways. In this work, by  
43 metabolomics and biochemical approaches (including [<sup>13</sup>C]-labelled compounds), we  
44 provide evidences showing that CNglcs turnover is involved, at least in part, in SA  
45 biosynthesis in peach plants under control and stress conditions.

46 The main CNglcs in peach are prunasin and amygdalin, with mandelonitrile (MD),  
47 synthesized from Phe, controlling their turnover. In peach plants MD is at the hub of the  
48 suggested new SA biosynthetic pathway and CNglcs turnover, regulating both the  
49 amygdalin and SA biosynthesis. MD-treated peach plants displayed increased SA levels via  
50 benzoic acid (SA precursor). In addition, MD also provides partial protection against *Plum*  
51 *pox virus* infection in peach seedlings. Thus, we proposed a third pathway, alternative to  
52 the PAL pathway, for SA synthesis in peach plants.

53

54 **Keywords:** cyanogenesis; mandelonitrile; metabolomics; peach; phenylalanine; *Plum pox*  
55 *virus*; salicylic acid; salt stress

56

57

58           **Introduction**

59           The plant hormone salicylic acid (SA) is the focus of intensive research due to its  
60 function as an endogenous signal mediating plant defense responses against both biotic and  
61 abiotic stimuli. In addition to its well-known role as a key signaling and regulatory  
62 molecule in plant defense responses, SA also plays crucial roles in diverse biological  
63 processes such as cell growth and development, seed germination, stomatal aperture, and  
64 fruit yield, among others (Liu *et al.*, 2015; Rivas-San Vicente and Plasencia, 2011). Most of  
65 the currently available information about the SA biosynthesis pathway comes from works  
66 on *Arabidopsis* and other herbaceous plants (Chen *et al.*, 2009; Dempsey *et al.*, 2011). The  
67 proposed SA synthesis originates from chorismate, the end product of the shikimate  
68 pathway, by two distinct pathways: the isochorismate (IC) and the phenylalanine (Phe)  
69 ammonia-lyase (PAL) pathways (Dempsey *et al.*, 2011). The PAL pathway uses Phe as  
70 substrate, but its contribution to the total SA pool is minimal (ca. 5% of the total SA  
71 synthesis). The IC pathway, on the other hand, accounts for the bulk of SA synthesis (ca.  
72 95% of the total SA synthesis) (Chen *et al.*, 2009). Nevertheless, the biosynthetic pathway  
73 of SA in plants has not been fully characterized yet (Dempsey *et al.*, 2011), and knowledge  
74 regarding this topic is even scarcer in woody plants such as fruit trees.

75           Cyanogenic glycosides (CNgls) are specialized plant compounds (derived from  
76 amino acids) that release toxic hydrogen cyanide (HCN) and ketones when hydrolyzed by  
77  $\beta$ -glycosidases and  $\alpha$ -hydroxynitrilases in a process referred to as cyanogenesis (Gleadow  
78 and Møller, 2014). The main cyanogenic glucosides in *Prunus* species are prunasin and  
79 amygdalin, with mandelonitrile (MD) at the hub of its turnover (Sánchez-Pérez *et al.*,  
80 2008). Whereas CNgls have traditionally been associated with protection against  
81 herbivore and fungal attack, their role in other biological processes such as germination and  
82 bud burst has been suggested (Gleadow and Møller, 2014). Nevertheless, endogenous  
83 CNgls turnover may be highly species-dependent, and new functions for these molecules  
84 remain to be elucidated. For example, secondary metabolites turnover could act dissipating  
85 excess energy and providing reducing power in stress conditions (Neilson *et al.*, 2013;  
86 Selmar and Kleinwachter, 2013). Moreover, CNgls may also be able to quench reactive  
87 oxygen species such as  $H_2O_2$ , suggesting a possible role for these glycosides during  
88 unfavorable environmental conditions (Gleadow and Møller, 2014).

89           In peach plants, MD synthesized from Phe via cytochrome P450 enzymes (CYP79  
90 and CYP71) is converted into benzaldehyde and HCN by mandelonitrile lyase (MDL)  
91 activity, and benzaldehyde can be easily oxidized to produce benzoic acid (BA). In  
92 addition, benzaldehyde and benzoic acid appear as intermediate precursors of SA  
93 biosynthesis via the PAL pathway (Dempsey *et al.*, 2011; Ribnicky *et al.*, 1998). This fact  
94 led us to consider a relationship between cyanogenesis and SA biosynthesis (Fig. 1).  
95 Moreover, both SA and HCN are involved in thermogenesis events by the induction of the  
96 alternative oxidase pathway, either directly (SA) or through the inhibition of cytochrome c  
97 oxidase (HCN) (Taiz and Zeiger, 2010). In the present work, by feeding GF305 peach  
98 (*Prunus persica* L.) micropropagated shoots and seedlings with MD and Phe, we have  
99 accumulated strong evidence suggesting that MD could be metabolized into SA, linking the  
100 SA biosynthetic and cyanogenic glucoside pathways in peach plants. Here we show that  
101 MD could act as a hub controlling CNgles turnover and, at least in part, SA biosynthesis. It  
102 therefore seems that a third pathway for SA synthesis is present in peach plants, being this  
103 pathway functional under both control and stress conditions. This pathway is an alternative  
104 to the PAL pathway for SA biosynthesis from Phe, and it is initiated by cytochrome P450  
105 enzymes, similar to the indole-3-acetaldoxime pathway for auxin biosynthesis from  
106 tryptophan (Mano and Nemoto, 2012).

107           Furthermore, MD levels could be involved in defense responses by increasing the  
108 levels of SA and/or its interaction with oxidative signaling defense-induced pathways. To  
109 assess this hypothesis we have also analyzed the levels of enzymatic and non-enzymatic  
110 antioxidants in MD- and Phe-treated peach plants in addition to the expression of two genes  
111 involved in redox signaling and the phenotypic scoring system used for evaluating  
112 resistance and susceptibility to *Plum pox virus* (PPV) infection (Decroocq *et al.*, 2005).

113

114

115

116

## 117 **Material and Methods**

### 118 ***Plant material***

119 The assays were performed on GF305 peach (*Prunus persica* L.) plants, both under  
120 greenhouse and *in vitro* conditions. For *ex vitro* assays, after submitting the GF305 peach  
121 seedlings to an artificial rest period in a cold chamber to ensure uniformity and fast growth,  
122 seedlings were grown in 2 L pots in an insect-proof greenhouse and distributed to 3 batches  
123 (control and MD- and Phe-treated) of 15 plants each. Two different experiments were  
124 carried out in 2015 and 2016. Due to the fact that in the soil a small proportion of MD  
125 could be dissociate non-enzymatically during the course of the experiment, plants were  
126 irrigated twice per week with water (control) and 1 mM MD or 1 mM Phe for 7 weeks.

127 For *in vitro* assays [<sup>13</sup>C]-labelled compounds were used, and 200 µM MD- or Phe-  
128 alpha[<sup>13</sup>C] (Campro Scientific GmbH, Germany) were added to the micropropagation  
129 media during two sub-cultures. The micropropagated GF305 peach shoots were sub-  
130 cultured at 4-week intervals for micropropagation (Clemente-Moreno *et al.*, 2011).

### 131 ***Metabolomics analysis***

132 The levels of Phe, MD, amygdalin, benzoic acid and SA were determined in *in vitro*  
133 micropropagated shoots at the Metabolomics Platform at CEBAS-CSIC (Murcia, Spain).  
134 Leaf samples from micropropagated shoots were extracted in 50% methanol, filtered in  
135 PTFE 0.45 µm filters (Agilent Technologies) and analyzed using an Agilent 1290 Infinity  
136 UPLC system coupled to a 6550 Accurate-Mass quadrupole TOF mass spectrometer  
137 (Agilent Technologies). Standard curves for each compound were performed, and data  
138 were processed using Mass Hunter Qualitative Analysis software (version B.06.00 Agilent  
139 Technologies). Hormone levels in the leaves of MD-treated GF305 seedlings were  
140 determined using a UHPLC-mass spectrometer (Q-Exactive, ThermoFisher Scientific) at  
141 the Plant Hormone Quantification Platform at IBMCP (Valencia, Spain).

### 142 ***Extraction and enzymatic assays***

143 *In vitro* shoots and *ex vitro* leaf samples were homogenized with an extraction  
144 medium (1:3, w/v) containing 50 mM Tris-acetate buffer (pH 6), 0.1 mM EDTA, 2 mM  
145 cysteine, 0.2% (v/v) Triton X-100, 2% (w/v) polyvinylpyrrolidone (PVPP) and 1%

146 (w/v) polyvinyl-pyrrolidone (PVP). To determine APX, 20 mM ASC was added to the  
147 extraction medium. The extracts were filtered through two layers of nylon cloth and  
148 centrifuged at 13000 rpm for 10 min. The supernatant fraction was desalted on Sephadex  
149 G-25 NAP columns equilibrated with the same buffer used for homogenization. For APX  
150 activity, 2 mM sodium ascorbate was added to the equilibration buffer. The activities of the  
151 ASC–GSH cycle enzymes, POX, CAT and SOD, were assayed as previously described  
152 (Diaz-Vivancos *et al.*, 2008; Diaz-Vivancos *et al.*, 2013; Diaz-Vivancos *et al.*, 2006). MDL  
153 activity was assayed by monitoring the increase of absorbance at 280 nm due to the  
154 benzaldehyde released by the enzymatic hydrolysis of DL-mandelonitrile (Ueatrongchit *et*  
155 *al.*, 2008; Willeman *et al.*, 2000). The enzyme solution was added to a 50 mM Tris-acetate  
156 buffer pH 5 containing 0.1 mM mandelonitrile in a total volume of 1 ml. Protein  
157 determination was performed according to the method of Bradford (Bradford, 1976).

#### 158 ***Ascorbate and Glutathione analysis***

159 Leaf samples were snap-frozen in liquid nitrogen and stored at -80°C until use. The  
160 frozen samples were homogenized in 1 ml 1 M HClO<sub>4</sub>. Homogenates were centrifuged at  
161 12 000 g for 10 min, and the supernatant was neutralized with 5 M K<sub>2</sub>CO<sub>3</sub> to pH 5.5-6.  
162 The homogenate was centrifuged at 12 000 g for 1 min to remove KClO<sub>4</sub>. The supernatant  
163 obtained was used for ascorbate and glutathione determination (Pellny *et al.*, 2009;  
164 Vivancos *et al.*, 2010).

#### 165 ***Gene expression***

166 RNA samples were extracted using a GF1-Total RNA Extraction Kit (Vivantis)  
167 according to the manufacturer's instructions. The expression levels of *MDL*, *NPR1*, *TrxH*  
168 and the reference gene *translation elongation factor II (TEF2)* (Tong *et al.*, 2009) were  
169 determined by real-time RT-PCR using the GeneAmp 7500 sequence detection system  
170 (Applied Biosystems, Foster City, CA, USA) (Faize *et al.*, 2013). The accessions and  
171 primer sequences are as follows: *MDL1* (Y08211.1; forward 5'-gtttcgttgcaaagagggg-3';  
172 reverse 5'-gctttagggagtcatttccttgc-3'); *NPR1* (DQ149935; forward 5'-tgcacgagctccttagtca-  
173 3'; reverse 5'-cggttactgcgatcctaag-3'); *TrxH* (AF323593.1; forward 5'-  
174 tggcggagttggctaagaag-3'; 5'-ttcttggcaccacaacctt-3'); and *TEF2* (TC3544; forward 5'-  
175 ggtgtgacgatgaagatgatg-3'; reverse 5'-gaaggagaggggaaggtgaaag-3'). Relative quantification

176 of gene expression was calculated by the Delta-Delta Ct method, and the expressions of the  
177 genes of interest were normalized with the endogenous control *TEF2*.

### 178 ***Statistical analysis***

179 The data were analyzed by one-way or two-way ANOVA using SPSS 22 software.  
180 Means were separated with the Duncan's Multiple Range Test ( $P < 0.05$ ). F-values and  
181 probabilities associated with the main effects and possible interactions are indicated where  
182 appropriate.

183

184

## 185 **Results**

### 186 **SA biosynthesis from CNgles**

187 GF305 peach micropropagated shoots were fed with [ $^{13}\text{C}$ ]Phe or with [ $^{13}\text{C}$ ]MD. The  
188 addition of these compounds to the culture media had no important effect in the growth of  
189 the micropropagated peach shoots (Fig 2A). We determined the percentage of [ $^{13}\text{C}$ ]-  
190 labelled compounds from the total content of Phe, MD, BA and SA in the micropropagated  
191 peach shoots treated with either [ $^{13}\text{C}$ ]Phe or with [ $^{13}\text{C}$ ]MD (Fig. 3). Due to the high  
192 sensitivity of the UPLC-Quadrupole-TOF-MS system used for metabolomics analysis, we  
193 detected basal levels (less than 10%) of [ $^{13}\text{C}$ ]Phe, [ $^{13}\text{C}$ ]MD and [ $^{13}\text{C}$ ]SA in control  
194 micropropagated shoots (Fig. 3). It is important to note that we only found [ $^{13}\text{C}$ ]BA (one  
195 SA precursor) in non-stressed [ $^{13}\text{C}$ ]MD-fed micropropagated shoots. Of the total BA  
196 detected in [ $^{13}\text{C}$ ]MD-treated micropropagated shoots, nearly 40% was [ $^{13}\text{C}$ ]-labelled. In the  
197 presence of [ $^{13}\text{C}$ ]MD, nearly 20% of the total SA quantified appeared as [ $^{13}\text{C}$ ]SA.  
198 Regarding the [ $^{13}\text{C}$ ]Phe treatment, only a slight increase in the percentage of [ $^{13}\text{C}$ ]MD was  
199 observed in non-stressed *in vitro* peach shoots (Fig. 3).

200 After treatment, [ $^{13}\text{C}$ ]Phe-fed micropropagated shoots showed a significant increase  
201 in amygdalin (61%) and a non-significant increase in BA (Fig. 4). The [ $^{13}\text{C}$ ]MD-fed  
202 micropropagated shoots displayed a similar increase in amygdalin to that produced by the  
203 [ $^{13}\text{C}$ ]Phe treatment, indicating that the CNgles pathway is fully functional under our

204 experimental conditions. Interestingly, however, significant increases in BA and SA (of  
205 about 80%) were only observed after the [ $^{13}\text{C}$ ]MD treatment (Fig. 4).

206         Given the effect of MD treatments on SA levels in micropropagated peach shoots,  
207 we also fed peach seedlings grown under normal physiological conditions in a greenhouse  
208 with either MD or Phe. As observed in micropropagated peach shoots, irrigation with MD  
209 or Phe had no significant effects on the growth of peach seedlings, which showed normal  
210 growth in both the shoots and roots (Fig 2B). In this experiment, we analyzed the effect of  
211 the 1 mM MD treatment on the hormone profile of leaf samples. Again, the MD treatment  
212 produced an increase in SA levels (about 88%), similar to that noticed in *in vitro*  
213 micropropagated peach shoots (Table 1). Furthermore, due to the well-known cross-talk  
214 among plant hormones, MD affected also the levels of other hormones. The amount of  
215 ABA, another stress-related plant hormone, increased up to 45%. In addition, the 1 mM  
216 MD treatment also produced a significant increase in both the gibberellin GA1 and the  
217 cytokinin dihydrozeatine (DHZ) in the same range (nearly 60%) (Table 1).

#### 218         **SA biosynthesis and plant performance under stress conditions**

219         The level of SA was also determined in micropropagated peach shoots submitted to  
220 both abiotic and biotic stresses. Abiotic stress was achieved adding 30 mM NaCl to the  
221 culture media whereas *Plum pox virus* (PPV)-infected *in vitro* shoots (Clemente-Moreno *et*  
222 *al.*, 2011) were used to assess the biotic stress condition. PPV is the causal agent of sharka  
223 disease and the most destructive and detrimental disease affecting *Prunus* species  
224 (Clemente-Moreno *et al.*, 2015). Regarding SA biosynthesis, under control conditions a  
225 similar strong increase in the total content of SA was observed in NaCl- and PPV-stressed  
226 micropropagated peach shoots (Fig. 5). Contrary to what observed in non-stressed peach  
227 shoots, under both stress conditions [ $^{13}\text{C}$ ]Phe increased SA, whereas [ $^{13}\text{C}$ ]MD treatment did  
228 not increase the total SA content (Fig. 5). Nevertheless, stressed [ $^{13}\text{C}$ ]MD-fed  
229 micropropagated shoots displayed increases in the percentages of [ $^{13}\text{C}$ ]MD (45% and 148%  
230 by NaCl and PPV infection respectively) and [ $^{13}\text{C}$ ]SA (75% and 45% by NaCl and PPV  
231 infection respectively) (Fig. 3).

232         In addition, according to salinity damage observed, MD-treatment had not a  
233 significant effect on the *in vitro* shoots performance, whereas Phe seems to increase the salt



234 stress deleterious effect, as observed by the increase of leaves showing salinity injure per  
235 micropropagated shoot (Fig. S1). On the other hand, it is well known that SA is a key  
236 signaling molecule involved in systemic acquired resistance (SAR) and that it plays an  
237 important role in plant defense against pathogens, including plant viruses (Vlot *et al.* 2009).  
238 Micropropagated peach shoots, in spite of high virus content, did not show any PPV  
239 infection symptoms (Clemente-Moreno *et al.*, 2011). Thus, we analyzed the effect of both  
240 MD and Phe treatments (using non-labelled compounds) on PPV-infected peach seedlings  
241 under greenhouse conditions. The presence of sharka symptoms in peach leaves was scored  
242 for each plant according to a scale of 0 (no symptoms) to 5 (maximum symptom intensity),  
243 a common test used in the evaluation of resistance to sharka (Decroocq *et al.* 2005; Rubio  
244 *et al.* 2005). According to the mean intensity of symptoms in peach leaves, we observed  
245 that MD-treated seedlings showed a significant decrease in PPV-induced symptoms (Fig.  
246 6). This effect correlated with the increased SA levels found in MD-treated seedlings  
247 (Table 1). In contrast, although the Phe treatments also reduced sharka symptoms, no  
248 significant differences were observed compared with infected control seedlings (Fig. 6).

#### 249 **Effects on antioxidative metabolism: the inhibition of H<sub>2</sub>O<sub>2</sub>-scavenging** 250 **enzymes in MD-treated seedlings**

251 The effects of both the MD and Phe treatments on the antioxidative metabolism of  
252 *in vitro* peach GF305 micropropagated shoots were analyzed. ANOVA analysis showed  
253 that the treatments had a significant effect on all the analyzed antioxidant enzymes except  
254 for peroxidase (POX) and superoxide dismutase (SOD). Micropropagated peach shoots  
255 treated with Phe displayed more significant increases in the enzymatic activities measured  
256 than control plants. MD treatments, on the other hand, significantly increased  
257 monodehydroascorbate reductase (MDHAR), dehydroascorbate reductase (DHAR),  
258 catalase (CAT) and SOD activities (Table 2). It is interesting to remark that Phe-treated  
259 plants seem to have more active ascorbate-glutathione (ASC-GSH) cycle enzymes than  
260 MD-treated micropropagated shoots.

261 A different pattern was produced in GF305 seedlings. In this experiment, ANOVA  
262 analysis indicated that the treatments had a significant effect on ascorbate peroxidase  
263 (APX), glutathione reductase (GR), POX, CAT and SOD, but no significant effects were

264 observed in the ascorbic acid-recycling enzymes (MDHAR and DHAR) in any of the  
265 treatments (Table 2). The MD treatment produced a significant decrease in APX, POX and  
266 CAT activities (H<sub>2</sub>O<sub>2</sub>-detoxifying enzymes), which could be associated with the observed  
267 increase in SA (Durner and Klessig, 1995; Rao *et al.*, 1997). The Phe treatment, on the  
268 other hand, increased GR and SOD activity and decreased CAT activity (Table 2).

269 We also studied the effect of MD and Phe on the ascorbate and glutathione content  
270 in leaf samples from peach seedlings. No oxidized ascorbate (DHA) was detected under our  
271 experimental conditions, and only the reduced form (ASC) was measured (Table 3). We  
272 observed that the treatments had a significant effect on ASC and oxidized glutathione  
273 (GSSG) concentrations as well as on the redox state of glutathione. Both treatments,  
274 particularly MD, decreased the ASC levels. In the case of MD, the decrease in ASC was  
275 about 50%, whereas Phe decreased ASC levels by about 30%. The effect of Phe or MD on  
276 reduced glutathione (GSH) was less pronounced: a 20% decrease was observed in both  
277 treatments (Table 3). In parallel, a significant accumulation of the oxidized form of  
278 glutathione (GSSG) was produced, mainly in Phe-treated plants, leading to a decrease in  
279 the redox state of glutathione in both MD- and Phe-treated plants (Table 3).

#### 280 **MDL1 activity and gene expression**

281 Once we determined that the MD treatment increased MD, BA and SA in  
282 micropropagated peach shoots and SA levels in peach seedlings, we wanted to check if the  
283 MD could stimulate and/or up-regulate the mandelonitrile lyase (MDL) activity and/or the  
284 *MDLI* gene expression. MDL activity catalyzed the breakdown of MD into benzaldehyde  
285 plus cyanide (Swain and Poulton, 1994b). Benzaldehyde could then be oxidized by  
286 aldehyde oxidase into BA, an SA precursor. In micropropagated peach shoots, both the MD  
287 and Phe treatments significantly increased MDL activity (Fig. 4). Regarding *MDLI* gene  
288 expression, although a slight increase in gene expression was observed in MD- and Phe-  
289 treated micropropagated shoots, differences were not statistically significant (data not  
290 shown).

291 In peach seedlings, control and MD-treated plants had higher MDL activity levels  
292 than Phe-treated plants. Moreover, MD-treated peach seedlings showed a slight increase in  
293 MDL activity when compared with control plants, although differences were not

294 statistically significant (Fig. 7A). Nevertheless, MD-treated seedlings displayed a 3-fold  
295 increase in *MDLI* gene expression (Fig. 7B).

### 296 **Gene expression of redox-related genes**

297 Due to the described role of SA in the induction of Non-Expressor of Pathogenesis-  
298 Related Gene 1 (*NPR1*) expression and the role of thioredoxins (Trx) in the SA-induced  
299 *NPR1* conformational changes (Dong, 2004; Tada *et al.*, 2008; Vieira Dos Santos and Rey,  
300 2006), we also analyzed the effect of both treatments (MD and Phe) on the *NPR1* and *TrxH*  
301 expression levels in peach seedlings. Whereas no significant changes in *NPR1* expression  
302 were observed with either treatment (Fig 7C), *TrxH* expression was significantly induced  
303 by Phe and MD treatments, with increases of about 42% and 23%, respectively (Fig 7C).

304

305

### 306 **Discussion**

307 In this work, we have accumulated strong evidence suggesting that mandelonitrile  
308 could be metabolized into SA, linking the SA biosynthetic and CNgls pathways in peach.  
309 Among this evidence, we observed increased levels of benzoic acid (BA) and SA as well as  
310 enhanced MDL activity and *MDLI* gene expression in MD-treated peach plants. Our results  
311 suggest that part of the total SA content in peach plants could be due to mandelonitrile, and  
312 hence CNgls turnover. This possibility has not been described before in higher plants.  
313 Mandelonitrile seems to act as a hub in this pathway controlling both the amygdalin and SA  
314 biosynthesis. Similarly, in other plant species, the biosynthesis of the plant hormone auxin  
315 from tryptophan via cytochrome P450 enzymes has been also described (Mano and  
316 Nemoto, 2012).

317 The experiments with [<sup>13</sup>C]-labelled MD or Phe carried out using *in vitro*  
318 micropropagated shoots revealed significant incorporation of <sup>13</sup>C as [<sup>13</sup>C]SA and [<sup>13</sup>C]BA,  
319 one of the SA precursors, in [<sup>13</sup>C]MD-treated micropropagated shoots. In fact, almost 40%  
320 of total BA and 20% of total SA appeared as <sup>13</sup>C-labelled compounds. In addition, and as  
321 expected, an important increase in amygdalin content was observed in both treatments.  
322 However, a possible route from Phe to BA cannot be ruled out because a slight increase in

323 BA was observed in [<sup>13</sup>C]Phe-treated micropropagated shoots, although this possibility  
324 does not seem to be important for SA biosynthesis because no parallel increase in [<sup>13</sup>C]BA  
325 or in SA was recorded. On the other hand, Phe is a ketogenic and glucogenic aminoacid,  
326 and it is a precursor for a wide range of specialized natural compounds (Yoo *et al.*, 2013),  
327 including CNgls, in peach plants. Moreover, treatment with [<sup>13</sup>C]Phe increased the  
328 percentage of [<sup>13</sup>C]MD observed, highlighting the central role MD plays in controlling both  
329 SA biosynthesis and CNgls synthesis and turnover.

330 It is known that during SA biosynthesis, benzaldehyde can be oxidized into BA in a  
331 reaction catalyzed by aldehyde oxidase (Dempsey *et al.*, 2011). In addition, the results for  
332 MDL activity and *MDLI* gene expression reinforce the possible role of MD in the increase  
333 in SA via BA. Accordingly, we observed a high *MDLI* expression level to sustain  
334 increased MDL activity when peach seedlings were treated with MD, but not in Phe-treated  
335 plants. We do not know the exact cellular location in which these reactions take place. In  
336 *Prunus serotina*, MDL was immunocytochemically localized in cell walls and vacuoles  
337 (Swain and Poulton, 1994a). However, no studies of the sub-cellular localization of MDL  
338 have been conducted in peach leaves. In previous works, due to the low contamination  
339 levels obtained, we suggested an apoplastic localization of MDL (Diaz-Vivancos *et al.*,  
340 2006), although a vacuolar localization should not be excluded.

341 Using a different analytical method than that used for micropropagated shoots, we  
342 were also able to detect an increase in leaf SA content under MD treatment in peach  
343 seedlings. Curiously, the SA increase observed was similar in both plant models (88% and  
344 83% in peach seedlings and micropropagated shoots, respectively). The MD treatment,  
345 besides increasing SA, also enhanced the concentration of ABA, GA1 and DHZ. It is  
346 known that cross-talk among different hormonal signals is involved in different  
347 physiological responses as well as in response to environmental challenges (Grant and  
348 Jones, 2009; Micol-Ponce *et al.*, 2015; Yang *et al.*, 2013). Among plant hormones, ABA  
349 and SA, along with JA and ethylene, play a major role in mediating plant defenses against  
350 biotic and abiotic factors (Verma *et al.*, 2016; Yang *et al.*, 2013). Moreover, the interaction  
351 of SA with other plant hormones regulating certain plant responses has been also reported  
352 (Bari and Jones, 2009). For example, the role of cytokinins in modulating SA signaling in  
353 biotic and abiotic stress responses is well documented (Choi *et al.*, 2010; Rivero *et al.*,

354 2009). GAs levels and signaling are also involved in plant defense (Zhu *et al.*, 2005), and  
355 the interaction of auxins with SA can limit disease through the down-regulation of auxin  
356 signaling (Wang *et al.*, 2007). ABA can also promote plant defense responses depending on  
357 different factors, such as the pathogen, the development stage of the plant and the target  
358 tissue (Yang *et al.*, 2013).

359 NPR1 is a key regulator in the signal transduction pathway that leads to SAR. The  
360 induction or overexpression of the NPR1 protein leads to increased induction of *PR* genes  
361 and enhanced disease resistance (Dong, 2004). Inactive NPR1 occurs in the cytosol as  
362 oligomers, held together by disulfide bridges. SA-induced changes in the redox state can  
363 lead to monomerization by the reduction of Cys residues via the action of TrxH (Tada *et*  
364 *al.*, 2008) (Fig. 7). NPR1 monomers are translocated to the nucleus, activating defense  
365 genes (Vlot *et al.*, 2009). Under our experimental conditions we were not able to detect any  
366 *NPR1* induction, although the up-regulation of *TrxH* was noticed, suggesting its role in the  
367 activation of NPR1 monomerization and thus in enabling the activation of defense genes.  
368 Similarly, in a previous work, we were not able to detect any *NPR1* gene induction in  
369 micropropagated peach shoots treated with benzothiadiazole, a SA analogous inducer of  
370 SAR (Clemente-Moreno *et al.*, 2012). The interaction of SA with heme-containing  
371 proteins, such as the H<sub>2</sub>O<sub>2</sub>-scavenger enzymes (CAT, APX or POX), can produce redox  
372 stress, which can initiate the release of NPR1 monomers and their entry into the nuclei  
373 (Durner and Klessig, 1995). Accordingly, we described a decrease in these enzymes in  
374 MD-treated peach plants. Moreover, MD also decreased the levels of reduced ascorbic acid  
375 and the glutathione redox state, leading to a more oxidized environment (Fig. 8). It has been  
376 suggested that SA induces changes to the redox environment by modulating GSH levels  
377 and reducing power, stimulating the plant defense responses (Herrera-Vasquez *et al.*, 2015;  
378 Vlot *et al.*, 2009; Yang *et al.*, 2004). The known role of SA and ABA in the control of  
379 stomatal closure (Khokon *et al.*, 2011) and the MD-induced SA and ABA levels (Table 1)  
380 displayed in peach seedlings could led us to speculate that MD-treated peach plants could  
381 tolerate situations of water and/or saline stress.

382 We have observed that the MD treatment induced partial protection against PPV  
383 infection in peach seedlings. Based on our results, we can suggest that the partial protection

384 from PPV in MD-treated GF305 peach plants could be independent of *NPR1* induction.  
385 Indeed, it is known that some SA-induced defense genes do not require *NPR1*, suggesting  
386 that other proteins can be important in SA perception (Blanco *et al.*, 2005) (Fig. 8).  
387 Moreover, the MD treatment increased DHZ levels, and this cytokinin has been found to  
388 induce partial protection against *White clover mosaic virus* with no changes in the  
389 expression of SA-responsive genes (Gális *et al.*, 2004). Moreover, in spite of its well-  
390 known role on plant defense against pathogens (Alvarez *et al.*, 1998), SA has been  
391 increasingly recognized as abiotic stress modulator via SA-mediated regulation of  
392 important plant-metabolic processes (Khan *et al.*, 2015). Thus, MD levels and hence the  
393 CNgls turnover could be involved in defense responses by increasing the levels of SA  
394 and/or the interaction with oxidative signaling defense-induced pathways. On the other  
395 hand, in micropropagated peach shoots, although MD treatment did not increase the SA  
396 content under abiotic and biotic stress conditions (Fig. 5), data from Fig. 3 show that a  
397 small amount of MD is metabolized to SA. Taking together, we suggest that under stress  
398 conditions this new SA biosynthetic pathway contributes much less to the total amount of  
399 SA than the PAL pathway.

400 We have therefore shown that the addition of a small molecule like MD can reveal  
401 very useful information on the mechanisms of interaction of various hormones in  
402 coordinating responses to environmental stress in plants. In conclusion, in this work we  
403 provide strong evidence for a new SA biosynthetic pathway from MD in peach by using  
404 two different plant models and different analytical approaches. Although we acknowledge  
405 that additional genetic evidences would provide complementary data, the feasibility of  
406 genetic approaches in peach plants is scarce nowadays. The MD molecule seems to act as a  
407 hub in this novel pathway controlling amygdalin and SA biosynthesis (Fig. 8). The MD  
408 treatment induced the gene expression of *MDL1* to maintain MDL activity. This result  
409 reinforces the possible role of MD in the increase of SA via BA, which has been described  
410 as an SA precursor (Dempsey *et al.*, 2011; Ribnicky *et al.*, 1998). In addition, there was  
411 also a pleiotropic effect on other plant hormones (ABA, GA1, DHZ). MD, and therefore  
412 SA, induced *TrxH*, but not *NPR1*. However, the effect of MD (or SA) in the antioxidative  
413 machinery can induce redox stress, which can facilitate NPR1 monomerization and  
414 therefore its effect on defense gene induction (Durner and Klessig, 1995). This argument is

415 supported by the partial protection against PPV induced by the MD treatment.  
416 Alternatively, and based in our results, it is also possible that the partial protection against  
417 PPV in MD-treated GF305 peach plants could be independent of *NPRI* induction, as  
418 described by other authors (Blanco *et al.*, 2005). Nevertheless, because this new pathway  
419 seems not to be relevant under stress conditions, at least under *in vitro* conditions, further  
420 investigation will be required in order to elucidate how relevant is this new pathway for  
421 plant performance.

422

423

#### 424 **Supplementary data**

425 **Fig. S1.-** Effect of [<sup>13</sup>C]MD or [<sup>13</sup>C]Phe on NaCl-stressed micropropagated peach shoots.

426

427

#### 428 **Acknowledgments**

429 This work was supported by the Spanish Ministry of Economy and Competitiveness  
430 (Project AGL2014-52563-R). PDV and CP thank CSIC and UPCT, respectively, as well as  
431 the Spanish Ministry of Economy and Competitiveness for their ‘Ramon & Cajal’ research  
432 contract, co-financed by FEDER funds. We also acknowledge Prof. Manuel Acosta  
433 Echeverría for his very useful commentaries and discussion.

434

435

436

437

438

439

## 440 **References**

- 441 **Alvarez ME, Pennell RI, Meijer PJ, Ishikawa A, Dixon RA, Lamb C.** 1998. Reactive oxygen  
442 intermediates mediate a systemic signal network in the establishment of plant immunity. *Cell* **92**,  
443 773-784.
- 444 **Bari R, Jones JD.** 2009. Role of plant hormones in plant defence responses. *Plant Molecular*  
445 *Biology* **69**, 473-488.
- 446 **Blanco F, Garreton V, Frey N, Dominguez C, Perez-Acle T, Van der Straeten D, Jordana X,**  
447 **Holuigue L.** 2005. Identification of NPR1-dependent and independent genes early induced by  
448 salicylic acid treatment in Arabidopsis. *Plant Molecular Biology* **59**, 927-944.
- 449 **Bradford MM.** 1976. A rapid and sensitive method for the quantitation of microgram quantities of  
450 protein utilizing the principle of protein-dye binding. *Analytical Biochemistry* **72**, 248-254.
- 451 **Clemente-Moreno MJ, Diaz-Vivancos P, Piqueras A, Antonio Hernandez J.** 2012. Plant growth  
452 stimulation in Prunus species plantlets by BTH or OTC treatments under in vitro conditions. *Journal*  
453 *of Plant Physiology* **169**, 1074-1083.
- 454 **Clemente-Moreno MJ, Hernandez JA, Diaz-Vivancos P.** 2015. Sharka: how do plants respond to  
455 Plum pox virus infection? *Journal of Experimental Botany* **66**, 25-35.
- 456 **Clemente-Moreno MJ, Piqueras A, Hernández JA.** 2011. Implication of peroxidase activity in  
457 development of healthy and PPV-infected micropropagated GF305 peach plants. *Plant Growth*  
458 *Regulation* **65**, 359-367.
- 459 **Chen Z, Zheng Z, Huang J, Lai Z, Fan B.** 2009. Biosynthesis of salicylic acid in plants. *Plant Signaling*  
460 *& Behavior* **4**, 493-496.
- 461 **Choi J, Huh SU, Kojima M, Sakakibara H, Paek K-H, Hwang I.** 2010. The Cytokinin-Activated  
462 Transcription Factor ARR2 Promotes Plant Immunity via TGA3/NPR1-Dependent Salicylic Acid  
463 Signaling in Arabidopsis. *Developmental Cell* **19**, 284-295.
- 464 **Decroocq V, Foulongne M, Lambert P, Gall OL, Mantin C, Pascal T, Schurdi-Levraud V, Kervella J.**  
465 2005. Analogues of virus resistance genes map to QTLs for resistance to sharka disease in Prunus  
466 davidiana. *Molecular Genetics and Genomics* **272**, 680-689.
- 467 **Dempsey DMA, Vlot AC, Wildermuth MC, Klessig DF.** 2011. Salicylic Acid Biosynthesis and  
468 Metabolism. *The Arabidopsis Book*, e0156.
- 469 **Diaz-Vivancos P, Clemente-Moreno MJ, Rubio M, Olmos E, Garcia JA, Martinez-Gomez P,**  
470 **Hernandez JA.** 2008. Alteration in the chloroplastic metabolism leads to ROS accumulation in pea  
471 plants in response to plum pox virus. *Journal of Experimental Botany* **59**, 2147-2160.
- 472 **Diaz-Vivancos P, Faize M, Barba-Espin G, Faize L, Petri C, Hernández JA, Burgos L.** 2013. Ectopic  
473 expression of cytosolic superoxide dismutase and ascorbate peroxidase leads to salt stress  
474 tolerance in transgenic plums. *Plant Biotechnology Journal* **11** 976-985.
- 475 **Diaz-Vivancos P, Rubio M, Mesonero V, Periago PM, Barcelo AR, Martinez-Gomez P, Hernandez**  
476 **JA.** 2006. The apoplasmic antioxidant system in Prunus: response to long-term plum pox virus  
477 infection. *Journal of Experimental Botany* **57**, 3813-3824.
- 478 **Dong X.** 2004. NPR1, all things considered. *Current Opinion in Plant Biology* **7**, 547-552.
- 479 **Durner J, Klessig DF.** 1995. Inhibition of ascorbate peroxidase by salicylic acid and 2,6-  
480 dichloroisonicotinic acid, two inducers of plant defense responses. *Proceedings of the National*  
481 *Academy of Sciences U S A* **92**, 11312-11316.
- 482 **Faize M, Faize L, Petri C, Barba-Espin G, Diaz-Vivancos P, Clemente-Moreno MJ, Koussa T, Rifai**  
483 **LA, Burgos L, Hernandez JA.** 2013. Cu/Zn superoxide dismutase and ascorbate peroxidase enhance  
484 in vitro shoot multiplication in transgenic plum. *Journal of Plant Physiology* **170**, 625-632.



- 485 **Gális I, Smith JL, Jameson PE.** 2004. Salicylic acid-, but not cytokinin-induced, resistance to WCIMV  
486 is associated with increased expression of SA-dependent resistance genes in *Phaseolus vulgaris*.  
487 *Journal of Plant Physiology* **161**, 459-466.
- 488 **Gleadow RM, Møller BL.** 2014. Cyanogenic Glycosides: Synthesis, Physiology, and Phenotypic  
489 Plasticity. *Annual Review of Plant Biology* **65**, 155-185.
- 490 **Grant MR, Jones JD.** 2009. Hormone (dis)harmony moulds plant health and disease. *Science* **324**,  
491 750-752.
- 492 **Herrera-Vasquez A, Salinas P, Holuigue L.** 2015. Salicylic acid and reactive oxygen species  
493 interplay in the transcriptional control of defense genes expression. *Frontiers in Plant Science* **6**,  
494 171.
- 495 **Khan MI, Fatma M, Per TS, Anjum NA, Khan NA.** 2015. Salicylic acid-induced abiotic stress  
496 tolerance and underlying mechanisms in plants. *Frontiers in Plant Science* **6**, 462.
- 497 **Khokon AR, Okuma E, Hossain MA, Munemasa S, Uraji M, Nakamura Y, Mori IC, Murata Y.** 2011.  
498 Involvement of extracellular oxidative burst in salicylic acid-induced stomatal closure in  
499 *Arabidopsis*. *Plant Cell & Environment* **34**, 434-443.
- 500 **Liu X, Rockett KS, Kørner CJ, Pajerowska-Mukhtar KM.** 2015. Salicylic acid signalling: new insights  
501 and prospects at a quarter-century milestone. *Essays In Biochemistry* **58**, 101-113.
- 502 **Mano Y, Nemoto K.** 2012. The pathway of auxin biosynthesis in plants. *Journal of Experimental*  
503 *Botany* **63**, 2853-2872.
- 504 **Micol-Ponce R, Sanchez-Garcia AB, Xu Q, Barrero JM, Micol JL, Ponce MR.** 2015. Arabidopsis  
505 INCURVATA2 Regulates Salicylic Acid and Abscisic Acid Signaling, and Oxidative Stress Responses.  
506 *Plant Cell Physiology* **56**, 2207-2219.
- 507 **Neilson EH, Goodger JQ, Woodrow IE, Moller BL.** 2013. Plant chemical defense: at what cost?  
508 *Trends in Plant Science* **18**, 250-258.
- 509 **Pellny TK, Locato V, Vivancos PD, Markovic J, De Gara L, Pallardo FV, Foyer CH.** 2009. Pyridine  
510 Nucleotide Cycling and Control of Intracellular Redox State in Relation to Poly (ADP-Ribose)  
511 Polymerase Activity and Nuclear Localization of Glutathione during Exponential Growth of  
512 *Arabidopsis* Cells in Culture. *Molecular Plant* **2**, 442-456.
- 513 **Rao MV, Paliyath G, Ormrod DP, Murr DP, Watkins CB.** 1997. Influence of salicylic acid on H<sub>2</sub>O<sub>2</sub>  
514 production, oxidative stress, and H<sub>2</sub>O<sub>2</sub>-metabolizing enzymes. Salicylic acid-mediated oxidative  
515 damage requires H<sub>2</sub>O<sub>2</sub>. *Plant Physiology* **115**, 137-149.
- 516 **Ribnicky DM, Shulaev VV, Raskin II.** 1998. Intermediates of salicylic acid biosynthesis in tobacco.  
517 *Plant Physiology* **118**, 565-572.
- 518 **Rivas-San Vicente M, Plasencia J.** 2011. Salicylic acid beyond defence: its role in plant growth and  
519 development. *Journal of Experimental Botany* **62**, 3321-3338.
- 520 **Rivero RM, Shulaev V, Blumwald E.** 2009. Cytokinin-dependent photorespiration and the  
521 protection of photosynthesis during water deficit. *Plant Physiology* **150**, 1530-1540.
- 522 **Sánchez-Pérez R, Jørgensen K, Olsen CE, Dicenta F, Møller BL.** 2008. Bitterness in Almonds. *Plant*  
523 *Physiology* **146**, 1040-1052.
- 524 **Selmar D, Kleinwachter M.** 2013. Stress enhances the synthesis of secondary plant products: the  
525 impact of stress-related over-reduction on the accumulation of natural products. *Plant Cell*  
526 *Physiology* **54**, 817-826.
- 527 **Swain E, Poulton JE.** 1994a. Immunocytochemical Localization of Prunasin Hydrolase and  
528 Mandelonitrile Lyase in Stems and Leaves of *Prunus serotina*. *Plant Physiology* **106**, 1285-1291.
- 529 **Swain E, Poulton JE.** 1994b. Utilization of Amygdalin during Seedling Development of *Prunus*  
530 *serotina*. *Plant Physiology* **106**, 437-445.
- 531 **Tada Y, Spoel SH, Pajerowska-Mukhtar K, Mou Z, Song J, Dong X.** 2008. Plant Immunity Requires  
532 Conformational Changes of NPR1 via S-Nitrosylation and Thioredoxins. *Science* **321**, 952-956

- 533 **Taiz L, Zeiger E.** 2010. *Plant Physiology*: Sinauer Associates.
- 534 **Tong Z, Gao Z, Wang F, Zhou J, Zhang Z.** 2009. Selection of reliable reference genes for gene  
535 expression studies in peach using real-time PCR. *BMC Molecular Biology* **10**, 71.
- 536 **Ueatrongchit T, Kayo A, Komeda H, Asano Y, H-Kittikun A.** 2008. Purification and Characterization  
537 of A Novel (R)-Hydroxynitrile Lyase from Eriobotrya japonica (Loquat). *Bioscience, Biotechnology,*  
538 *and Biochemistry* **72**, 1513-1522.
- 539 **Verma V, Ravindran P, Kumar PP.** 2016. Plant hormone-mediated regulation of stress responses.  
540 *BMC Plant Biology* **16**, 86.
- 541 **Vieira Dos Santos C, Rey P.** 2006. Plant thioredoxins are key actors in the oxidative stress  
542 response. *Trends in Plant Science* **11**, 329-334.
- 543 **Vivancos PD, Dong YP, Ziegler K, Markovic J, Pallardo FV, Pellny TK, Verrier PJ, Foyer CH.** 2010.  
544 Recruitment of glutathione into the nucleus during cell proliferation adjusts whole-cell redox  
545 homeostasis in Arabidopsis thaliana and lowers the oxidative defence shield. *Plant Journal* **64**,  
546 825-838.
- 547 **Vlot AC, Dempsey DA, Klessig DF.** 2009. Salicylic Acid, a multifaceted hormone to combat disease.  
548 *Annual Review of Phytopathology* **47**, 177-206.
- 549 **Wang D, Pajeroska-Mukhtar K, Culler AH, Dong X.** 2007. Salicylic Acid Inhibits Pathogen Growth  
550 in Plants through Repression of the Auxin Signaling Pathway. *Current Biology* **17**, 1784-1790.
- 551 **Willeman WF, Hanefeld U, Straathof AJJ, Heijnen JJ.** 2000. Estimation of kinetic parameters by  
552 progress curve analysis for the synthesis of (R)-mandelonitrile by Prunus amygdalus hydroxynitrile  
553 lyase. *Enzyme and Microbial Technology* **27**, 423-433.
- 554 **Yang DL, Yang Y, He Z.** 2013. Roles of plant hormones and their interplay in rice immunity.  
555 *Molecular Plant* **6**, 675-685.
- 556 **Yang Y, Qi M, Mei C.** 2004. Endogenous salicylic acid protects rice plants from oxidative damage  
557 caused by aging as well as biotic and abiotic stress. *Plant Journal* **40**, 909-919.
- 558 **Yoo H, Widhalm JR, Qian Y, Maeda H, Cooper BR, Jannasch AS, Gonda I, Lewinsohn E, Rhodes D,**  
559 **Dudareva N.** 2013. An alternative pathway contributes to phenylalanine biosynthesis in plants via  
560 a cytosolic tyrosine:phenylpyruvate aminotransferase. *Nature Communications* **4**, 2833.
- 561 **Zhu S, Gao F, Cao X, Chen M, Ye G, Wei C, Li Y.** 2005. The rice dwarf virus P2 protein interacts with  
562 ent-kaurene oxidases in vivo, leading to reduced biosynthesis of gibberellins and rice dwarf  
563 symptoms. *Plant Physiology* **139**, 1935-1945.

564

565

566

567

568

569

570

571

572

573

574

575 **Tables.**

576 **Table 1.** Effect of MD treatment on hormone levels in leaves of GF305 seedlings grown  
577 under greenhouse conditions. Data are expressed as ng g<sup>-1</sup> FW except for SA levels (μg g<sup>-1</sup>  
578 FW). Data represent the mean ± SE of at least eight repetitions of each treatment. Different  
579 letters indicate significant differences according to Duncan's test (P≤0.05).

580

581

582

583

584

585

586

587

588

589

|                                | <b>Control</b> | <b>MD 1 mM</b>  |
|--------------------------------|----------------|-----------------|
| <b>Stress-related hormones</b> |                |                 |
| SA                             | 3.73±0.24 b    | 7.01±1.16 a     |
| ABA                            | 996.88±14.95 b | 1444.79±64.23 a |
| <b>Gibberellins</b>            |                |                 |
| GA4                            | 0.50±0.08      | 0.41±0.02       |
| GA1                            | 0.27±0.03 b    | 0.43±0.04 a     |
| <b>Citokinins</b>              |                |                 |
| DHZ                            | 1.28±0.21 b    | 2.02±0.05 a     |
| IP                             | 0.69±0.08      | 0.64±0.04       |
| Tz                             | 1.31±0.10      | 1.33±0.08       |

**Table 2.** Effect of MD and Phe treatments on APX, MDHAR, DHAR, GR, POX, CAT, and SOD activities in *in vitro* GF305 shoots and in leaves of GF305 seedlings. APX, MDHAR, DHAR, and GR are expressed as nmol min<sup>-1</sup> mg<sup>-1</sup> protein. POX and CAT are expressed as μmol min<sup>-1</sup> mg<sup>-1</sup> protein, and SOD as U mg<sup>-1</sup> protein. Data represent the mean ± SE of at least five repetitions. Different letters in the same column indicate significant differences according to Duncan's test (P≤0.05). F-values from two-way ANOVA significant at the 99.9% (\*\*\*), 99% (\*\*), or 95% (\*) level of probability (Treatment factor: Tto).

| <i>In vitro</i><br>Treatment | APX            | MDHAR           | DHAR           | GR              | POX               | CAT         | SOD          |
|------------------------------|----------------|-----------------|----------------|-----------------|-------------------|-------------|--------------|
| Control                      | 316.0 ± 48.0 b | 866.2 ± 8.9 b   | 246.0 ± 18.5 c | 342.8 ± 7.9 b   | 1453.8 ± 22.4 b   | 4.1 ± 0.1 b | 36.2 ± 2.5 b |
| MD                           | 257.0 ± 32.7 b | 1539.6 ± 81 a   | 490.2 ± 29.6 b | 387.0 ± 8.7 b   | 1600.4 ± 231.0 ab | 7.2 ± 1.1 a | 57.8 ± 8.1 a |
| Phe                          | 490.9 ± 35.9 a | 1538.6 ± 37.4 a | 791.3 ± 1.2 a  | 489.6 ± 19.1 a  | 1935.9 ± 78.6 a   | 6.5 ± 0.4 a | 56.0 ± 3.4 a |
| <b>ANOVA</b>                 |                |                 |                | <b>F-values</b> |                   |             |              |
| Tto                          | 8.8*           | 56.3***         | 190.7***       | 33.6**          | 3.8               | 5.7*        | 4.9          |

  

| <i>Seedlings</i><br>Treatment | APX            | MDHAR            | DHAR           | GR              | POX              | CAT           | SOD            |
|-------------------------------|----------------|------------------|----------------|-----------------|------------------|---------------|----------------|
| Control                       | 344.9 ± 64.6 a | 1262.9 ± 115.4 a | 472.8 ± 51.6 a | 180.4 ± 4.4 b   | 1291.8 ± 136.9 a | 96.1 ± 6.8 a  | 119.1 ± 17.1 b |
| MD                            | 198.2 ± 15.7b  | 1300.7 ± 13.6 a  | 405.7 ± 31.6 a | 196.3 ± 16.0 b  | 969.1 ± 20.3 b   | 53.25 ± 2.2 c | 107.9 ± 4.9 b  |
| Phe                           | 403.6 ± 22.1a  | 1106.6 ± 28.3 a  | 436.2 ± 18.2 a | 283.8 ± 12.4 a  | 1323.7 ± 53.0 a  | 70.4 ± 1.9 b  | 198.3 ± 12.9 a |
| <b>ANOVA</b>                  |                |                  |                | <b>F-values</b> |                  |               |                |
| Tto                           | 9.2**          | 2.8              | 0.9            | 21.6**          | 5.8*             | 25.3**        | 17.9**         |

**Table 3.** Effect of MD and Phe treatments on reduced ascorbic acid (ASC) and glutathione content in the leaves of GF305 peach seedlings. Data represent the mean  $\pm$  SE of at least five repetitions. Different letters in the same column indicate significant differences according to Duncan's test ( $P \leq 0.05$ ). F-values from two-way ANOVA significant at the 99.9% (\*\*\*), 99% (\*\*), or 95% (\*) level of probability (Treatment factor: Tto).

| Treatment    | GLUTATHIONE (nmol/g FW)      |                    |                  |             |
|--------------|------------------------------|--------------------|------------------|-------------|
|              | ASC ( $\mu\text{mol/g FW}$ ) | GSH                | GSSG             | Redox state |
| Control      | 15.2 $\pm$ 1.2 a             | 223.6 $\pm$ 17.6 a | 13.0 $\pm$ 1.2 c | 0.94 a      |
| MD           | 7.0 $\pm$ 0.5 c              | 176.2 $\pm$ 11.3 b | 16.3 $\pm$ 0.8 b | 0.91 b      |
| Phe          | 10.7 $\pm$ 0.8 b             | 181.1 $\pm$ 9.2 b  | 26.6 $\pm$ 1.2 a | 0.87 c      |
| <b>ANOVA</b> |                              | <b>F-values</b>    |                  |             |
| Tto          | 18.3**                       | 3.8                | 39.9***          | 20.3***     |

## Figure legends.

**Figure 1.** Proposed SA biosynthetic pathway in peach plants. Blue arrows indicate the already described SA biosynthesis in plants (dot arrow, putative; CYP79 and CYP71, Cyt P450 monooxygenases; MDL1, mandelonitrile lyase), whereas red arrows show the new pathway suggested for peach plants.

**Figure 2.** Micropropagated GF305 peach shoots (A) and seedlings (B) grown under control conditions and in the presence of mandelonitrile (MD) and phenylalanine (Phe). *In vitro* shoots were micropropagated by incorporating 200  $\mu\text{M}$  of either [ $^{13}\text{C}$ ]MD or [ $^{13}\text{C}$ ]Phe into the media, whereas peach seedlings were watered with 1 mM solution of MD or Phe. Neither of the treatments had effects on plant growth and development.

**Figure 3.** Percentage of [ $^{13}\text{C}$ ]-phenylalanine, mandelonitrile, benzoic acid, and salicylic acid in non-stressed, NaCl-stressed and PPV-infected peach shoots micropropagated in the presence or absence of [ $^{13}\text{C}$ ]MD or [ $^{13}\text{C}$ ]Phe. Under control conditions, basal levels of [ $^{13}\text{C}$ ]-mandelonitrile, phenylalanine and salicylic acid were observed, whereas [ $^{13}\text{C}$ ]benzoic acid was only detected in [13C]MD-treated micropropagated shoots. Ions with an additional 1.0035 accurate mass and confirmation by isotopic distribution and spacing were defined as ions marked with  $^{13}\text{C}$ . Data represent the mean of at least 20 repetitions of each treatment.

**Figure 4.** Total levels ( $\mu\text{M g}^{-1}$  FW) of amygdalin, benzoic acid, mandelonitrile, phenylalanine and salicylic acid, and MDL enzymatic activity in micropropagated peach shoots in the presence or absence of [ $^{13}\text{C}$ ]MD or [ $^{13}\text{C}$ ]Phe. Data represent the mean  $\pm$  SE of at least 12 repetitions of each treatment. Different letters indicate significant differences in each graph according to Duncan's test ( $P \leq 0.05$ ).

**Figure 5.** Total level ( $\mu\text{M g}^{-1}$  FW) of salicylic acid in peach shoots micropropagated in the presence or absence of [13C]MD or [13C]Phe, submitted to salt stress (30 mM NaCl; A) or PPV infection (B).

**Figure 6.** Phenotypic scoring for evaluating the resistance/susceptibility to PPV infection (Decroocq *et al.*, 2005) and sharka symptoms in peach plants. Data represent the mean  $\pm$  SE of at least 18 repetitions (samples from two independent assays carried out in 2015 and

2016) of each treatment. Different letters indicate significant differences according to Duncan's test ( $P \leq 0.05$ ).

**Figure 7.** Mandelonitrile lyase enzymatic activity (A), *MDLI* gene expression (B), and gene expression of *TrxH* and *NPR1* (C) in GF305 peach seedlings grown in the presence or absence of MD or Phe. Data represent the mean  $\pm$  SE of at least five repetitions of each treatment. Different letters indicate significant differences in each graph according to Duncan's test ( $P \leq 0.05$ ).

**Figure 8.** Proposed roles of MD in peach plants. MD is involved in CNGlcs turnover and in SA biosynthesis. In addition, MD treatment leads to a more oxidized environment, which could modify the function of proteins such as those involved in the response to environmental stress conditions.

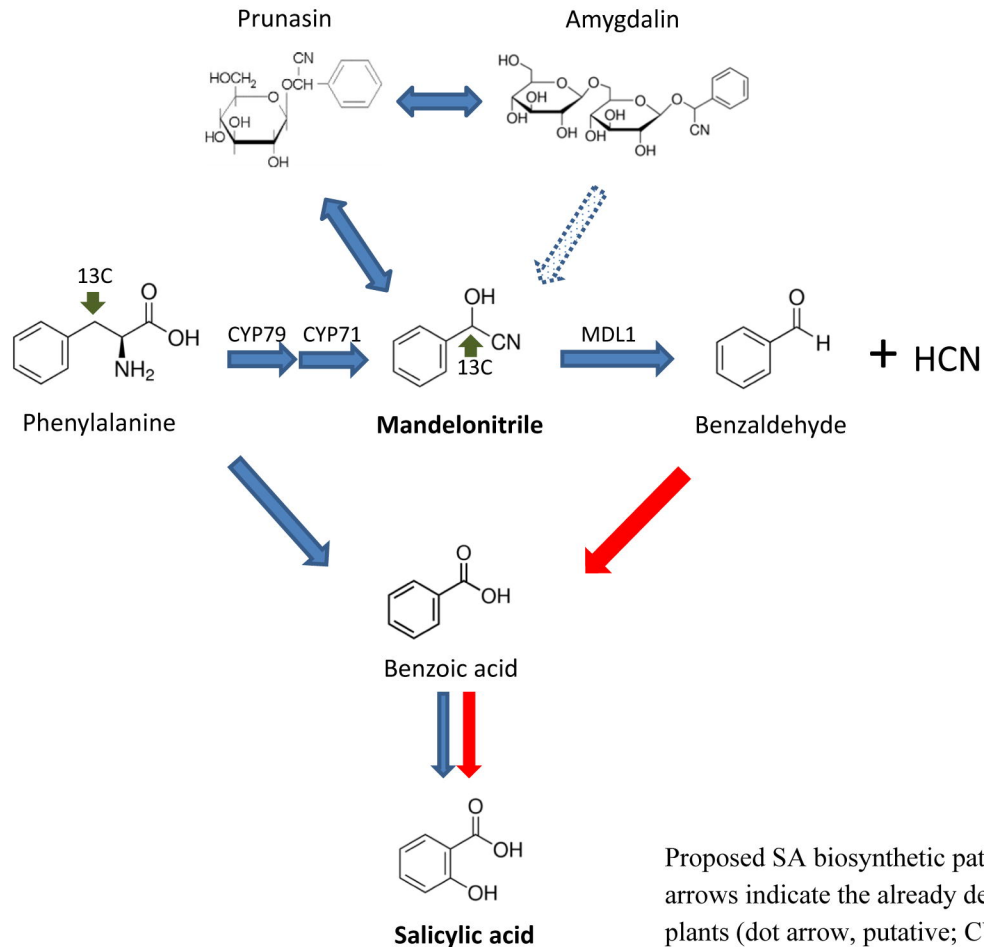

**Fig. 1**

Proposed SA biosynthetic pathway in peach plants. Blue arrows indicate the already described SA biosynthesis in plants (dot arrow, putative; CYP79 and CYP71, Cyt P450 monooxygenases; MDL1, mandelonitrile lyase), whereas red arrows show the new pathway suggested for peach plants.



**A**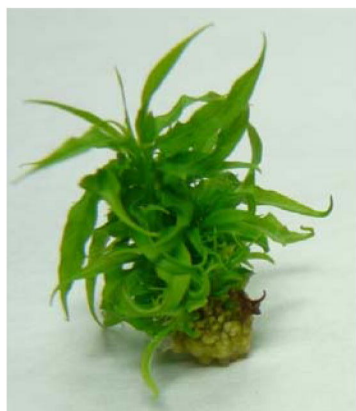

Control

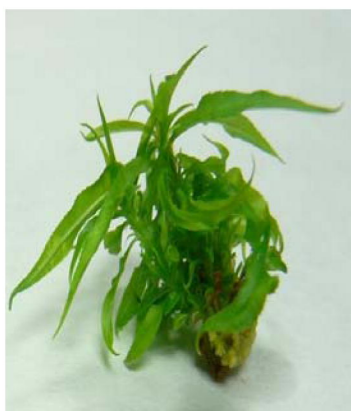

Phe

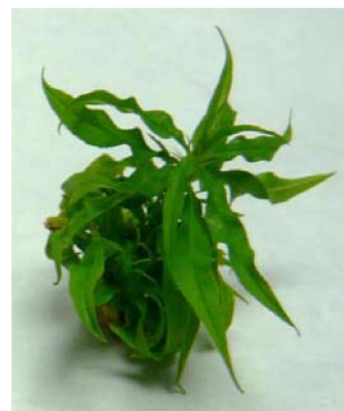

MD

**B**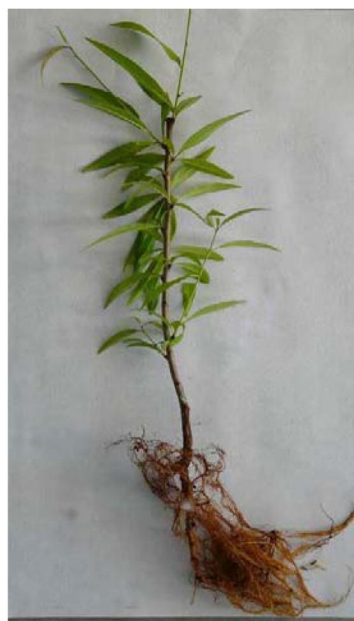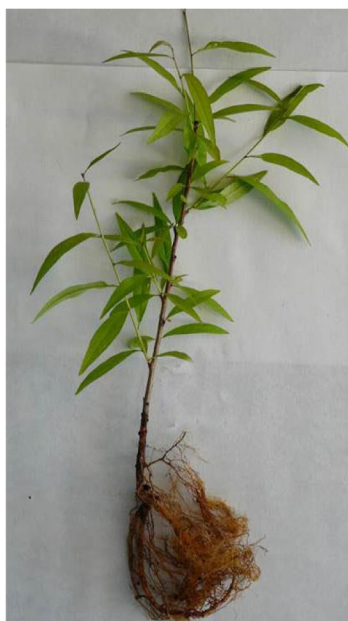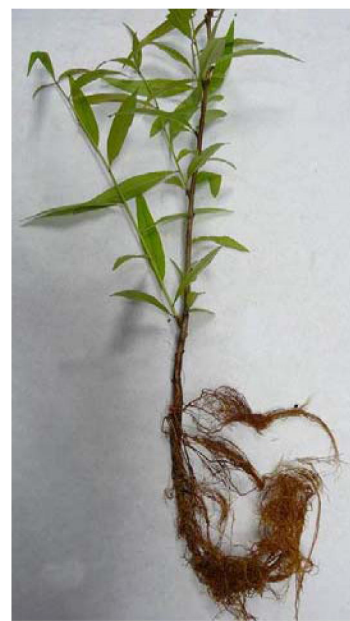

Fig. 2. Micropropagated GF305 peach shoots (A) and seedlings (B) grown under control conditions and in the presence of mandelonitrile (MD) and phenylalanine (Phe). In vitro shoots were micropropagated by incorporating 200  $\mu$ M of either MD or Phe into the media, whereas peach seedlings were watered with 1 mM solution of MD or Phe. Neither of the treatments had effects on plant growth and development.

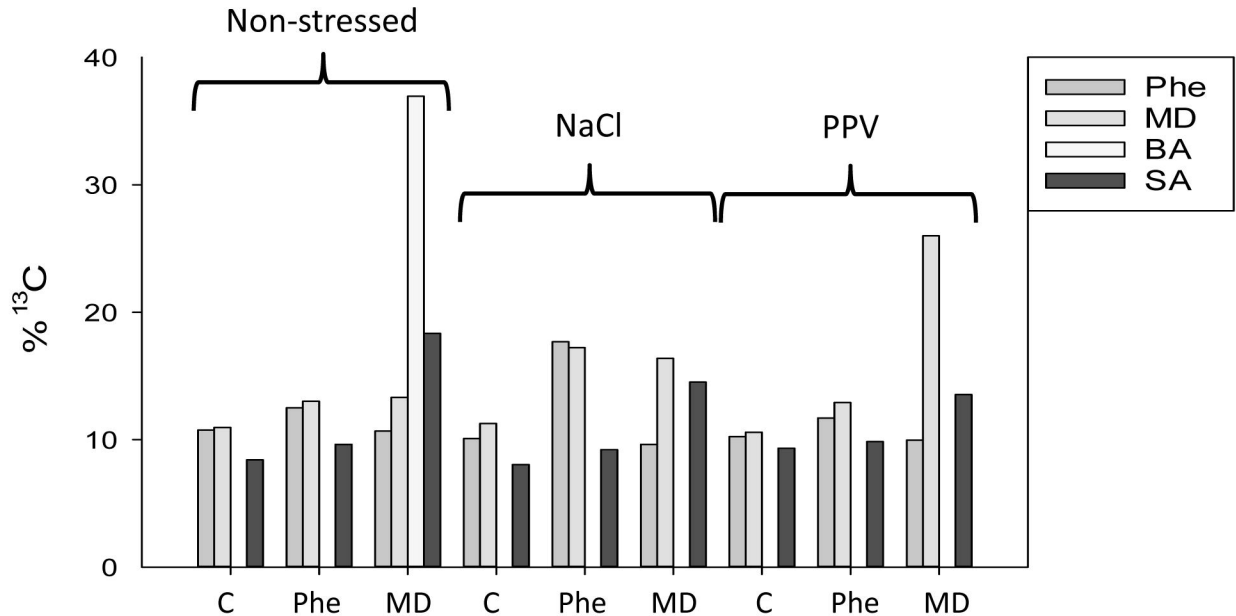

Fig. 3. Percentage of [ $^{13}\text{C}$ ]-phenylalanine, mandelonitrile, benzoic acid, and salicylic acid in non-stressed, NaCl-stressed and PPV-infected peach shoots micropropagated in the presence or absence of [ $^{13}\text{C}$ ]MD or [ $^{13}\text{C}$ ]Phe. Under control conditions, basal levels of [ $^{13}\text{C}$ ]-mandelonitrile, phenylalanine and salicylic acid were observed, whereas [ $^{13}\text{C}$ ]benzoic acid was only detected in [ $^{13}\text{C}$ ]MD-treated micropropagated shoots. Ions with an additional 1.0035 accurate mass and confirmation by isotopic distribution and spacing were defined as ions marked with  $^{13}\text{C}$ . Data represent the mean  $\pm$  SE of at least 20 repetitions of each treatment

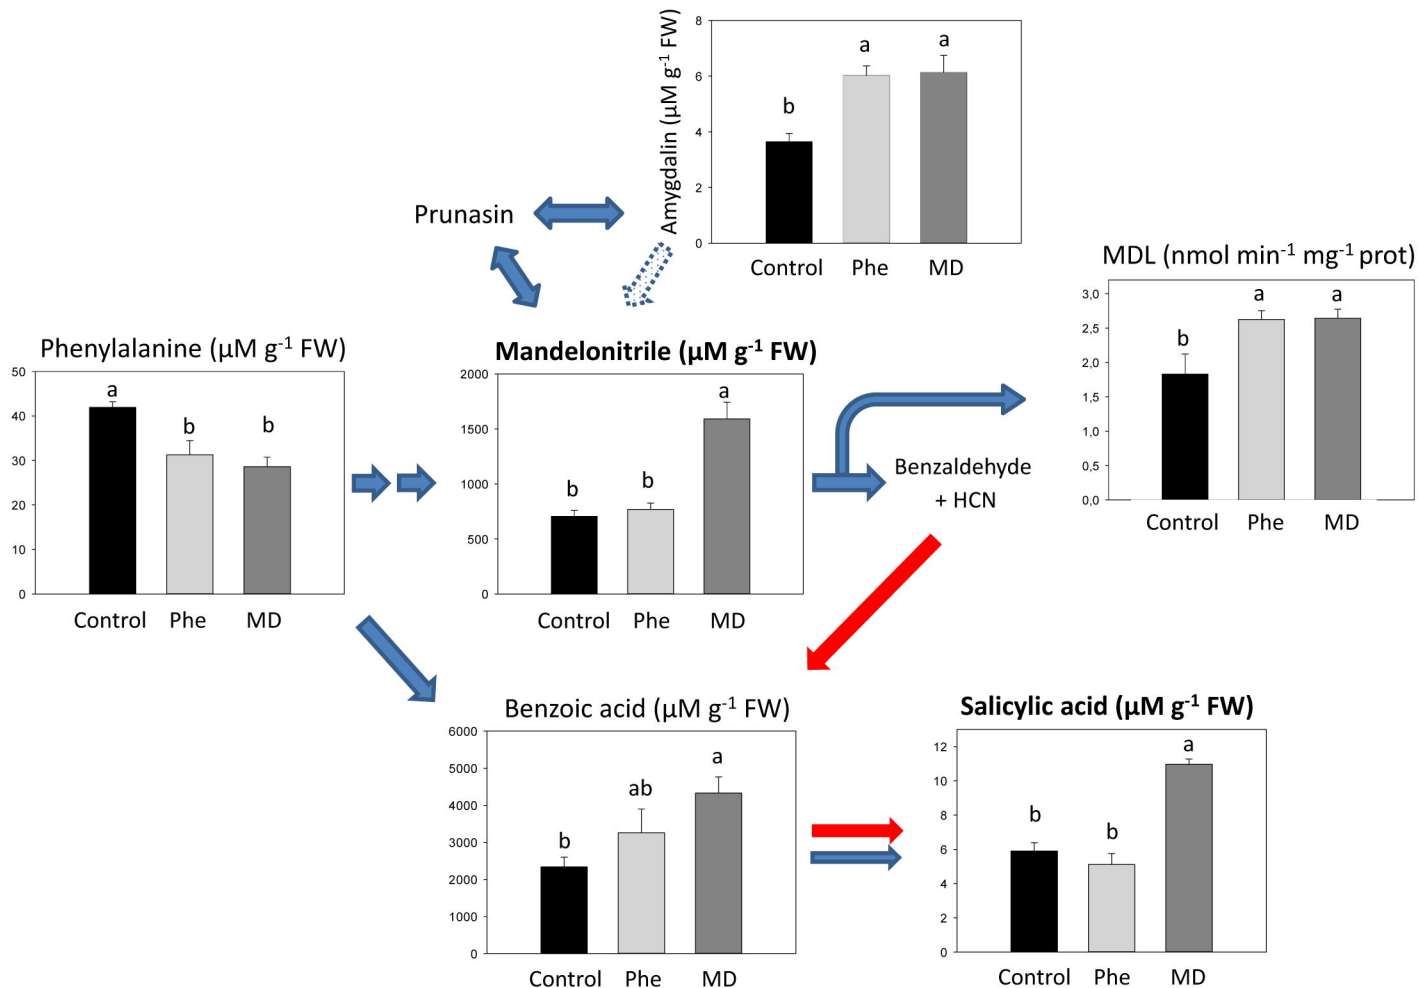

**Fig. 4.** Total levels ( $\mu\text{M g}^{-1}\text{ FW}$ ) of amygdalin, benzoic acid, mandelonitrile, phenylalanine and salicylic acid, and MDL enzymatic activity in micropropagated peach shoots in the presence or absence of [ $^{13}\text{C}$ ]MD or [ $^{13}\text{C}$ ]Phe. Data represent the mean  $\pm$  SE of at least 12 repetitions of each treatment. Different letters indicate significant differences in each graph according to Duncan's test ( $P \leq 0.05$ ).

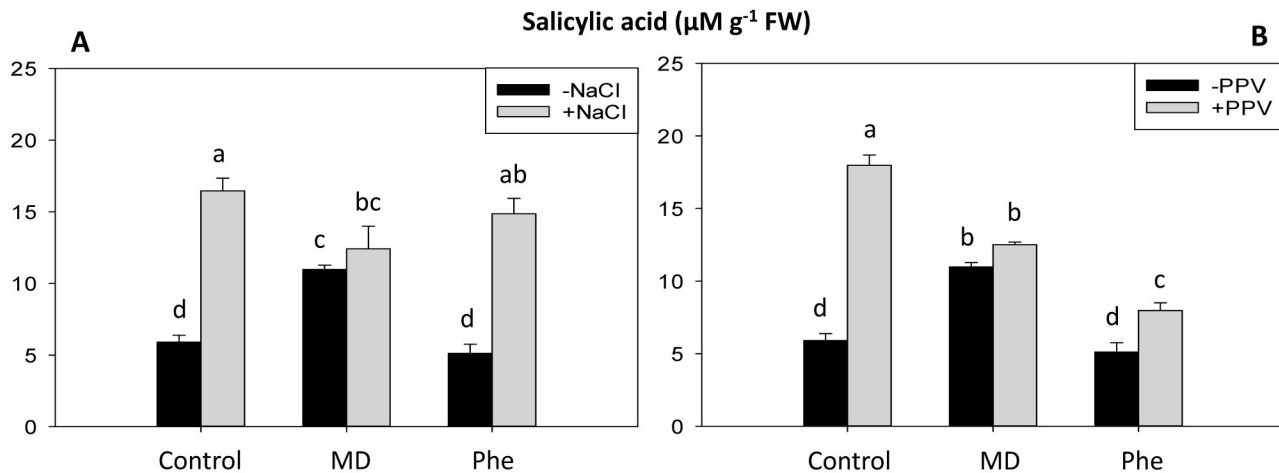

**Fig. 5.** Total level ( $\mu\text{M g}^{-1}$  FW) of salicylic acid in peach shoots micropropagated in the presence or absence of  $[^{13}\text{C}]\text{MD}$  or  $[^{13}\text{C}]\text{Phe}$ , submitted to salt stress (30 mM NaCl; A) or PPV infection (B).

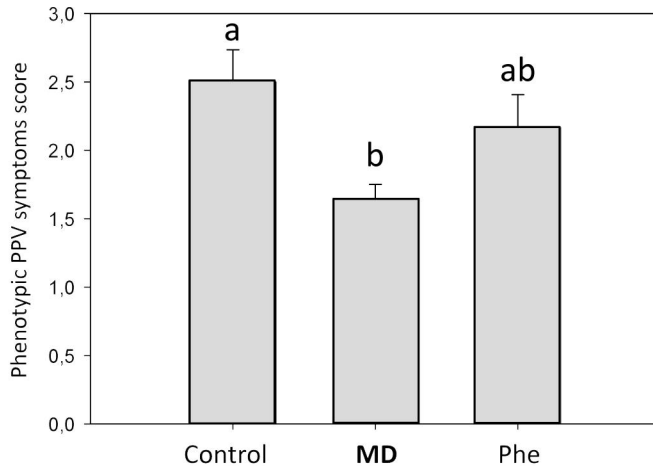

**Fig. 6.** Phenotypic scoring for evaluating the resistance/susceptibility to PPV infection ([Decroocq et al., 2005](#)) and sharka symptoms in peach plants. Data represent the mean  $\pm$  SE of at least 18 repetitions (samples from two independent assays carried out in 2015 and 2016) of each treatment. Different letters indicate significant differences according to Duncan's test ( $P \leq 0.05$ ).

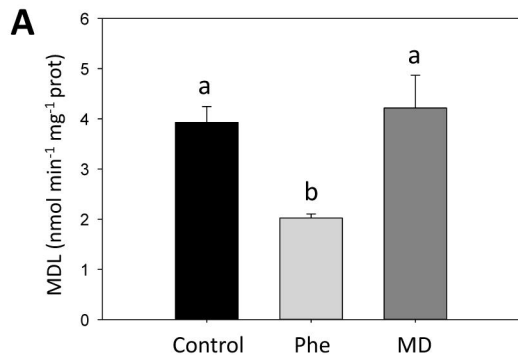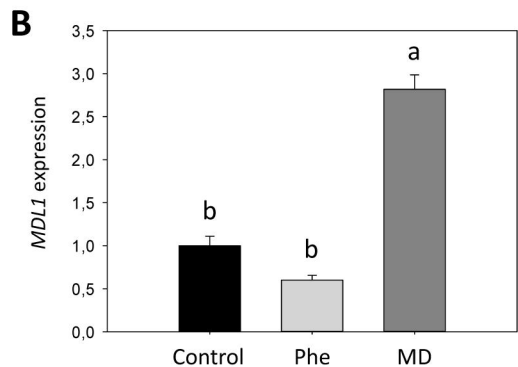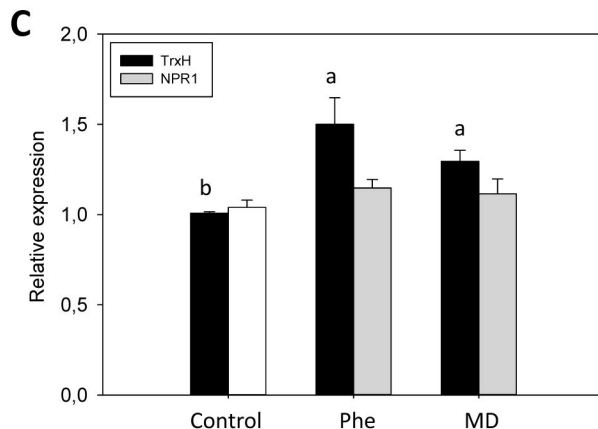

**Fig. 7.** Mandelonitrile lyase enzymatic activity (A), *MDL1* gene expression (B), and gene expression of *TrxH* and *NPR1* (C) in GF305 peach seedlings grown in the presence or absence of MD or Phe. Data represent the mean  $\pm$  SE of at least five repetitions of each treatment. Different letters indicate significant differences in each graph according to Duncan's test ( $P \leq 0.05$ ).

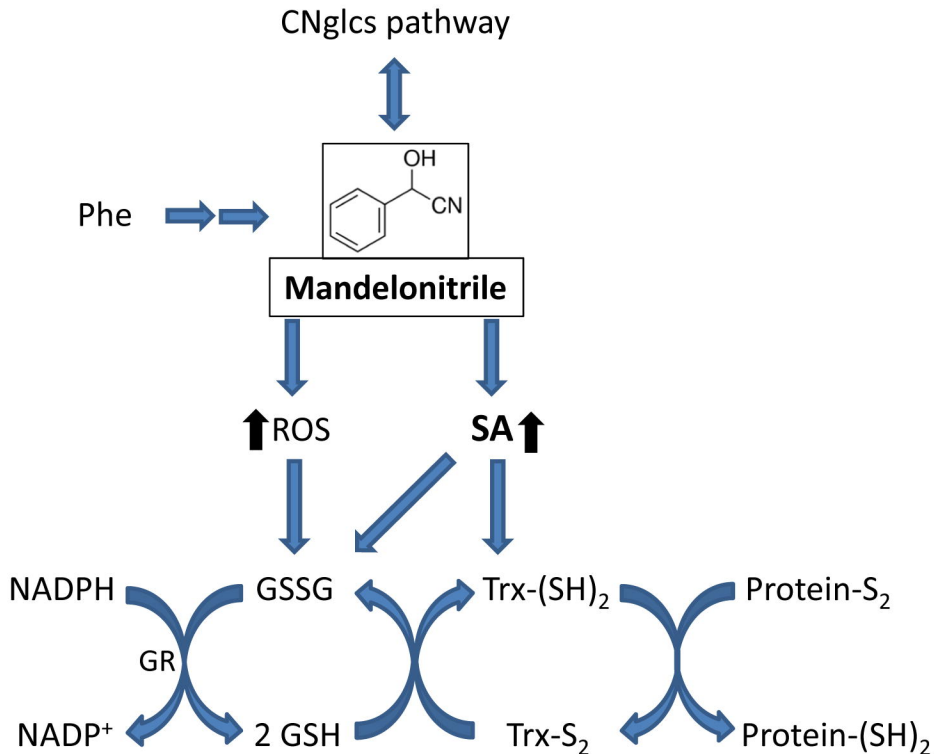

**Fig. 8.** Proposed roles of MD in peach plants. MD is involved in CNgIcs turnover and in SA biosynthesis. In addition, MD treatment leads to a more oxidized environment, which could modify the function of proteins such as those involved in the response to environmental stress conditions.
